# Supplementary material for: Classification and monomer-by-monomer annotation dataset of suprachromosomal family 1 alpha satellite higher-order repeats in hg38 human genome assembly
Source: PubMed Central journal article supplement — Data Brief. 2019 Mar 8;24:103708. doi: 10.1016/j.dib.2019.103708 (PMC6447721; doi:10.1016/j.dib.2019.103708), 2019-03-08

**Figure S2a. Group 1: S1CMH1d, S1C3H3d, S1C3H2, S1C12H3d, S1C6H1L, and fragment of S1C3H1L**

Group 1 is marked according to the types of monomers in S1CMH1d.

Basic HOR S1CMH1d in ABBA01004652.1

|         |    |    |    |    |
|---------|----|----|----|----|
| Mon     | 1  | 2  | 3  | 4  |
| Type    | A  | B  | A  | B  |
| Class   | R2 | Um | J1 | R1 |
| Num     | 1  | 2  | 3  | 4  |
| Group 1 | a  | b  | c  | d  |

Basic HOR S1C3H3d in ABBA01004655.1

|         |    |    |    |    |    |
|---------|----|----|----|----|----|
| Mon     | 1  | 2  | 3  | 4  | 5  |
| Type    | A  | B  | A  | B  | A  |
| Class   | R2 | R1 | J1 | R1 | J1 |
| Num     | 1  | 2  | 3  | 4  | 5  |
| Group 1 | a  | b  | c  | b  | c  |

Basic HOR S1C3H2 in GJ211866.1

|         |    |    |    |    |    |    |    |    |    |    |
|---------|----|----|----|----|----|----|----|----|----|----|
| Mon     | 1  | 2  | 3  | 4  | 5  | 6  | 7  | 8  | 9  | 10 |
| Type    | A  | B  | A  | A  | A  | A  | B  | A  | B  | A  |
| Class   | R2 | J2 | J1 | R1 | J1 | R2 | J2 | J1 | J2 | J1 |
| Num     | 1  | 2  | 3  | 4  | 5  | 6  | 7  | 8  | 9  | 10 |
| Group 1 | a  | b  | c  | b  | c  | a  | b  | c  | b  | c  |

Basic HOR S1C12H3d in AEKP01211346.1

|         |    |    |    |    |    |    |    |    |
|---------|----|----|----|----|----|----|----|----|
| Mon     | 1  | 2  | 3  | 4  | 5  | 6  | 7  | 8  |
| Type    | A  | B  | A  | B  | X  | A  | B  | A  |
| Class   | R2 | J2 | J1 | J2 | Um | Um | Um | J1 |
| Num     | 1  | 2  | 3  | 4  | 5  | 6  | 7  | 8  |
| Group 1 | a  | b  | c  | b  | c  | c  | b  | c  |

Basic HOR S1C6H1L in GJ211907.1

|         |    |    |    |    |    |    |    |    |    |    |    |    |    |    |    |    |    |    |
|---------|----|----|----|----|----|----|----|----|----|----|----|----|----|----|----|----|----|----|
| Mon     | 1  | 2  | 3  | 4  | 5  | 6  | 7  | 8  | 9  | 10 | 11 | 12 | 13 | 14 | 15 | 16 | 17 | 18 |
| Type    | A  | B  | A  | A  | B  | A  | B  | A  | B  | A  | B  | A  | B  | A  | B  | B  | A  | B  |
| Class   | J1 | J2 | J1 | J1 | J2 | J1 | J1 | J1 | J2 | J1 | J2 | J1 | J2 | J1 | J2 | J2 | J1 | J2 |
| Num     | 1  | 2  | 3  | 4  | 5  | 6  | 7  | 8  | 9  | 10 | 11 | 12 | 13 | 14 | 15 | 16 | 17 | 18 |
| Group 1 | c  | b  | c  | a  | b  | c  | d  | a  | b  | a  | b  | a  | b  | a  | b  | b  | a  | b  |

Basic HOR S1C3H1L in GJ211871.1

|         |    |    |    |    |    |    |    |    |    |    |    |    |    |    |    |    |    |
|---------|----|----|----|----|----|----|----|----|----|----|----|----|----|----|----|----|----|
| Mon     | 1  | 2  | 3  | 4  | 5  | 6  | 7  | 8  | 9  | 10 | 11 | 12 | 13 | 14 | 15 | 16 | 17 |
| Type    | A  | B  | A  | B  | A  | B  | A  | B  | A  | A  | B  | A  | B  | A  | B  | A  | B  |
| Class   | J1 | J2 | J1 | J2 | J1 | J2 | J1 | J2 | J1 | Um | J2 | J1 | J2 | J1 | J2 | J1 | J2 |
| Num     | 1  | 2  | 3  | 4  | 5  | 6  | 7  | 8  | 9  | 10 | 11 | 12 | 13 | 14 | 15 | 16 | 17 |
| Group 1 | c  | b  | c  | b  | c  | b  | c  | b  | c  | b  | c  | a  | b  | c  | b  | c  | b  |

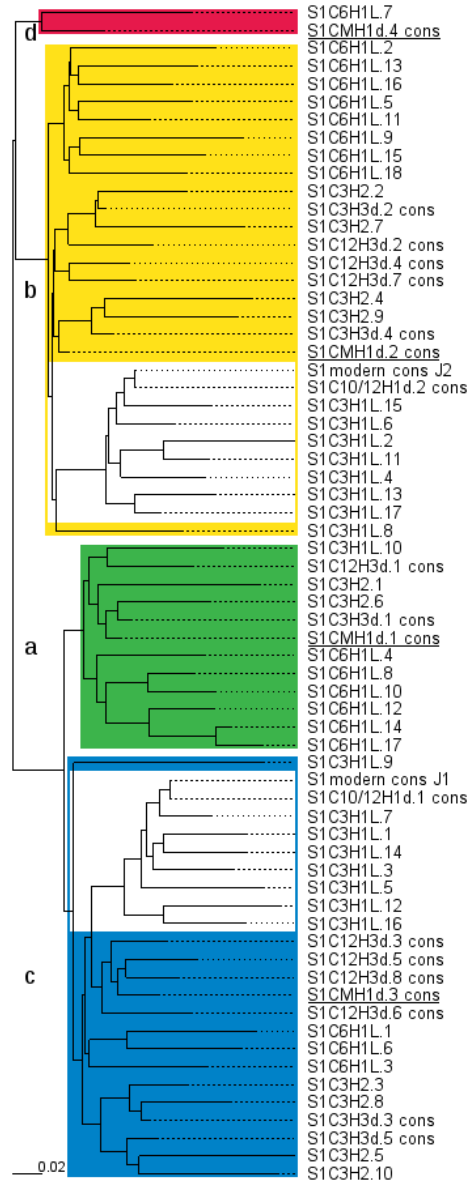

Note: Modern monomers of S1C3H1L are left not colored. One can see that they are derived versions of the 2 kinds of archaic monomers (b and c).

## Group 2: S1C5pH2, S1C1/5/19H1L, S1C16H1L

Group 2 is marked according to the types of monomers in S1C5pH2.

### Basic HOR S1C5pH2 in GJ211887.1

|         |    |    |    |    |    |    |    |    |    |    |    |    |    |    |    |    |
|---------|----|----|----|----|----|----|----|----|----|----|----|----|----|----|----|----|
| Mon     | 1  | 2  | 3  | 4  | 5  | 6  | 7  | 8  | 9  | 10 | 11 | 12 | 13 | 14 | 15 | 16 |
| Type    | B  | A  | B  | X  | B  | A  | B  | A  | U  | A  | B  | A  | B  | A  | B  | A  |
| Class   | J2 | J1 |
| Num     | 1  | 2  | 3  | 4  | 5  | 6  | 7  | 8  | 9  | 10 | 11 | 12 | 13 | 14 | 15 | 16 |
| Group 2 | a  | b  | c  | d  | e  | f  | e  | f  | g  | d  | a  | h  | g  | b  | c  | d  |

### Basic HOR S1C1/5/19H1L in GJ212203.1

|         |    |    |    |    |    |    |
|---------|----|----|----|----|----|----|
| Mon     | 1  | 2  | 3  | 4  | 5  | 6  |
| Type    | A  | B  | A  | B  | A  | B  |
| Class   | J1 | J2 | J1 | J2 | J1 | J2 |
| Num     | 1  | 2  | 3  | 4  | 5  | 6  |
| Group 2 | b  | c  | f  | a  | d  | a  |

### Basic HOR S1C16H1L in GJ212051.1

|         |    |    |    |    |    |    |    |    |    |    |
|---------|----|----|----|----|----|----|----|----|----|----|
| Mon     | 1  | 2  | 3  | 4  | 5  | 6  | 7  | 8  | 9  | 10 |
| Type    | A  | X  | A  | B  | A  | B  | A  | B  | A  | B  |
| Class   | J1 | J2 |
| Num     | 1  | 2  | 3  | 4  | 5  | 6  | 7  | 8  | 9  | 10 |
| Group 2 | b  | c  | d  | a  | d  | g  | f  | i  | b  | c  |

### Basic HOR S1C7H1L in GJ211908.1

|         |    |    |    |    |    |    |
|---------|----|----|----|----|----|----|
| Mon     | 1  | 2  | 3  | 4  | 5  | 6  |
| Type    | A  | B  | A  | B  | A  | B  |
| Class   | J1 | J2 | J1 | J2 | J1 | J2 |
| Num     | 1  | 2  | 3  | 4  | 5  | 6  |
| Group 2 |    |    |    |    |    | g  |

### Basic HOR S1C3H1L in GJ211871.1

|         |    |    |    |    |    |    |    |    |    |    |    |    |    |    |    |    |    |
|---------|----|----|----|----|----|----|----|----|----|----|----|----|----|----|----|----|----|
| Mon     | 1  | 2  | 3  | 4  | 5  | 6  | 7  | 8  | 9  | 10 | 11 | 12 | 13 | 14 | 15 | 16 | 17 |
| Type    | A  | B  | A  | B  | A  | B  | A  | B  | A  | A  | B  | A  | B  | A  | B  | A  | B  |
| Class   | J1 | J2 | J1 | J2 | J1 | J2 | J1 | J2 | J1 | Um | J2 | J1 | J2 | J1 | J2 | J1 | J2 |
| Num     | 1  | 2  | 3  | 4  | 5  | 6  | 7  | 8  | 9  | 10 | 11 | 12 | 13 | 14 | 15 | 16 | 17 |
| Group 2 |    |    |    |    |    |    | h  |    |    |    |    |    | i  |    |    |    | i  |

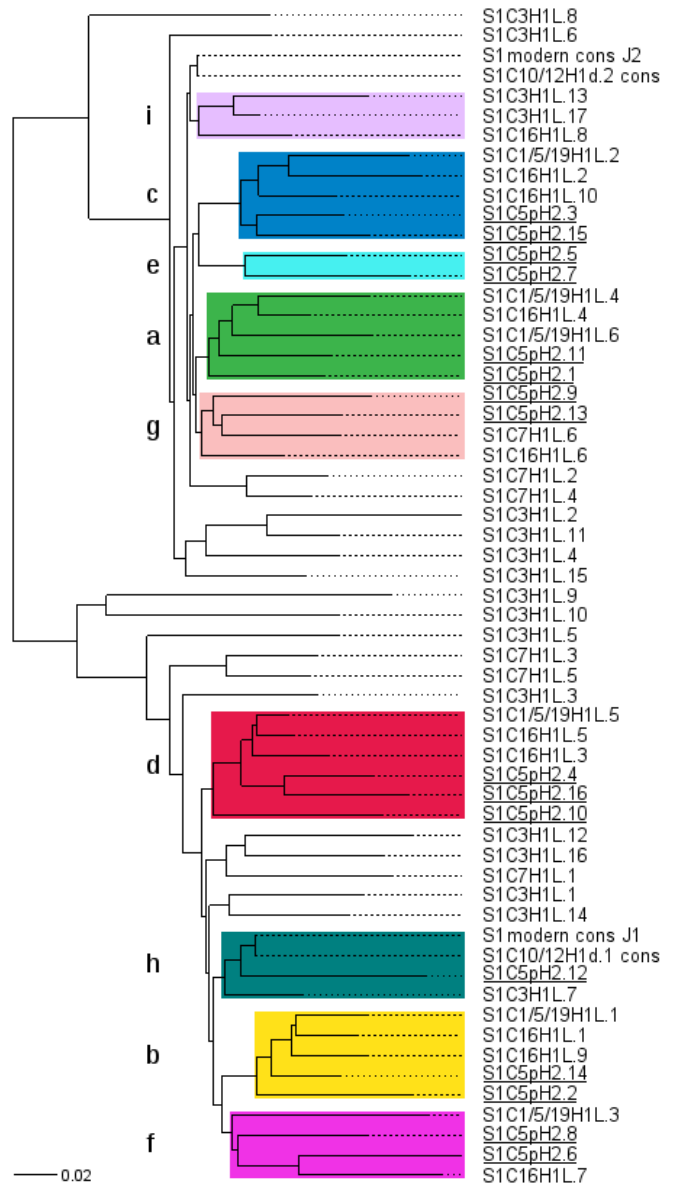

### Group 3: S1C10H1L, S1C10H1-B, S1C10H1-C, and S1C10H2

Group 3 is marked according to the types of monomers in S1C10H1L.

#### Basic HOR S1C10H1L in GJ211932.1

| Mon     | 1  | 2  | 3  | 4  | 5  | 6  | 7  | 8  |
|---------|----|----|----|----|----|----|----|----|
| Type    | A  | B  | A  | B  | A  | B  | A  | B  |
| Class   | J1 | J2 | J1 | J2 | J1 | J2 | J1 | J2 |
| Num     | 1  | 2  | 3  | 4  | 5  | 6  | 7  | 8  |
| Group 3 | a  | b  | c  | b  | c  | b  | a  | e  |

#### Basic HOR S1C10H1-B in GJ211933.1

| Mon     | 1  | 2  | 3  | 4  | 5  | 6  | 7  | 8  | 9  | 10 | 11 | 12 | 13 | 14 |
|---------|----|----|----|----|----|----|----|----|----|----|----|----|----|----|
| Type    | A  | B  | A  | B  | A  | B  | A  | B  | A  | B  | A  | B  | A  | B  |
| Class   | J1 | J2 |
| Num     | 1  | 2  | 3  | 4  | 5  | 2  | 3  | 4  | 5  | 6  | 7  | 6  | 7  | 8  |
| Group 3 | a  | b  | c  | b  | c  | b  | c  | b  | c  | b  | a  | b  | a  | e  |

#### Basic HOR S1C10H1-C in GJ211936.1

| Mon     | 1  | 2  | 3  | 4  | 5  | 6  | 7  | 8  |
|---------|----|----|----|----|----|----|----|----|
| Type    | A  | B  | A  | B  | A  | B  | A  | B  |
| Class   | J1 | J2 | J1 | J2 | J1 | J2 | J1 | J2 |
| Num     | 1  | 2  | 3  | 4  | 5  | 6  | 7  | 8  |
| Group 3 | a  | b  | c  | b  | c  | b  | a  | e  |

#### Basic HOR S1C10H2 in GJ211930.1

| Mon     | 1  | 2  | 3  | 4  | 5  | 6  | 7  | 8  | 9  | 10 | 11 | 12 | 13 | 14 | 15 | 16 | 17 | 18 |
|---------|----|----|----|----|----|----|----|----|----|----|----|----|----|----|----|----|----|----|
| Type    | A  | B  | A  | B  | A  | B  | A  | B  | A  | B  | A  | B  | A  | B  | A  | B  | A  | B  |
| Class   | J1 | J2 |
| Num     | 1  | 2  | 3  | 4  | 5  | 6  | 7  | 8  | 9  | 10 | 11 | 12 | 13 | 14 | 15 | 16 | 17 | 18 |
| Group 3 | c  | b  | a  | b  | c  | b  | d  | e  | a  | b  | d  | b  | d  | b  | d  | e  | a  | b  |

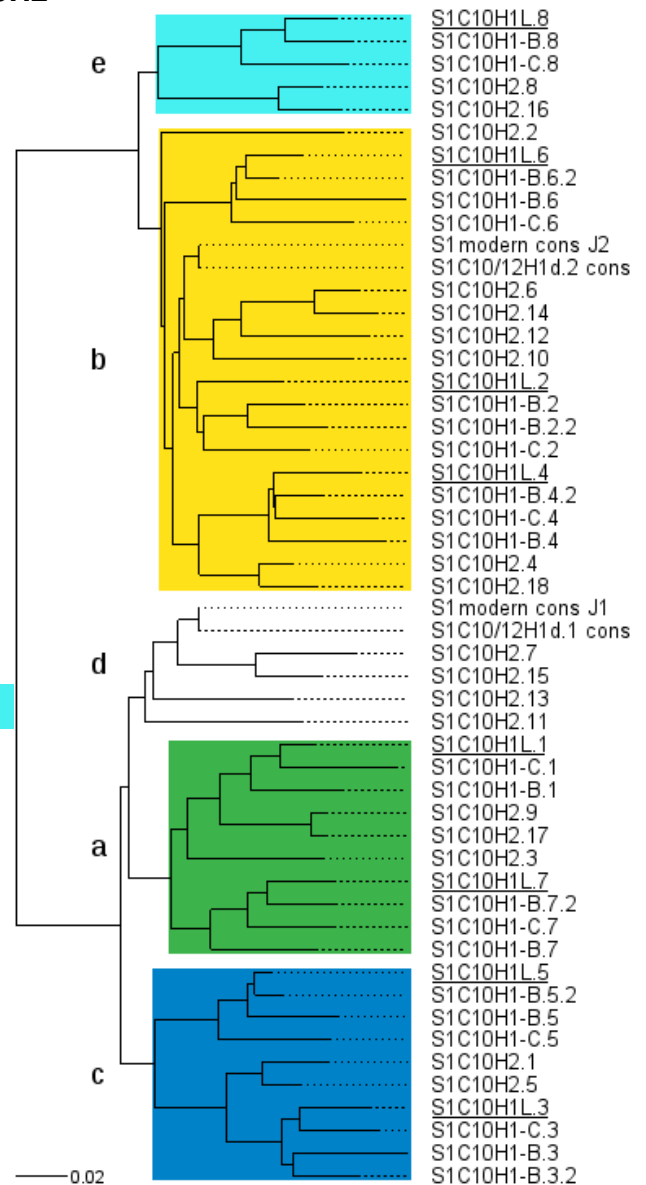

## Group 4: S1C12H2 and S1C12H1L

Group 4 is marked according to the types of monomers in S1C12H2.

### Basic HOR S1C12H2 in GJ211949.1

|         |    |    |    |    |    |    |    |    |    |    |    |    |    |    |    |    |    |    |
|---------|----|----|----|----|----|----|----|----|----|----|----|----|----|----|----|----|----|----|
| Mon     | 1  | 2  | 3  | 4  | 5  | 6  | 7  | 8  | 9  | 10 | 11 | 12 | 13 | 14 | 15 | 16 | 17 | 18 |
| Type    | A  | B  | A  | B  | A  | B  | A  | B  | A  | B  | A  | B  | A  | B  | A  | B  | X  | B  |
| Class   | J1 | J2 |
| Num     | 1  | 2  | 3  | 4  | 5  | 6  | 7  | 8  | 9  | 10 | 11 | 12 | 13 | 14 | 15 | 16 | 17 | 18 |
| Group 4 | a  | b  | c  | d  | e  | b  | e  | f  | e  | g  | c  | b  | e  | f  | e  |    | c  | d  |

### Basic HOR S1C12H1L in GJ211954.1

|         |    |    |    |    |    |    |    |    |
|---------|----|----|----|----|----|----|----|----|
| Mon     | 1  | 2  | 3  | 4  | 5  | 6  | 7  | 8  |
| Type    | A  | B  | A  | B  | A  | B  | A  | B  |
| Class   | J1 | J2 | J1 | J2 | J1 | J2 | J1 | J2 |
| Num     | 1  | 2  | 3  | 4  | 5  | 6  | 7  | 8  |
| Group 4 | c  | d  |    | g  | c  | d  | e  | g  |

### Basic HOR S1C7H1L in GJ211908.1

|         |    |    |    |    |    |    |
|---------|----|----|----|----|----|----|
| Mon     | 1  | 2  | 3  | 4  | 5  | 6  |
| Type    | A  | B  | A  | B  | A  | B  |
| Class   | J1 | J2 | J1 | J2 | J1 | J2 |
| Num     | 1  | 2  | 3  | 4  | 5  | 6  |
| Group 4 | a  | g  |    | g  |    | g  |

### Basic HOR S1C3H1L in GJ211871.1

|         |    |    |    |    |    |    |    |    |    |    |    |    |    |    |    |    |    |
|---------|----|----|----|----|----|----|----|----|----|----|----|----|----|----|----|----|----|
| Mon     | 1  | 2  | 3  | 4  | 5  | 6  | 7  | 8  | 9  | 10 | 11 | 12 | 13 | 14 | 15 | 16 | 17 |
| Type    | A  | B  | A  | B  | A  | B  | A  | B  | A  | A  | B  | A  | B  | A  | B  | A  | B  |
| Class   | J1 | J2 | J1 | J2 | J1 | J2 | J1 | J2 | J1 | Um | J2 | J1 | J2 | J1 | J2 | J1 | J2 |
| Num     | 1  | 2  | 3  | 4  | 5  | 6  | 7  | 8  | 9  | 10 | 11 | 12 | 13 | 14 | 15 | 16 | 17 |
| Group 4 |    |    |    |    |    |    |    |    |    |    | a  | f  |    |    | a  | f  |    |

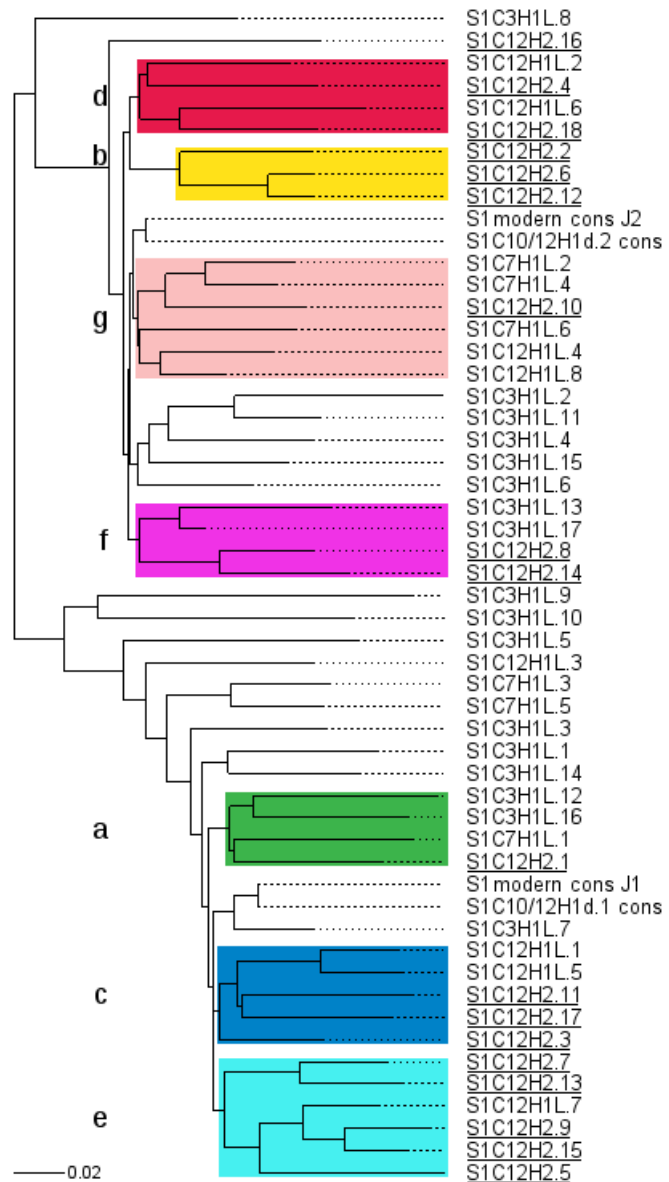

Figure S2b. SF1 A-type monomers

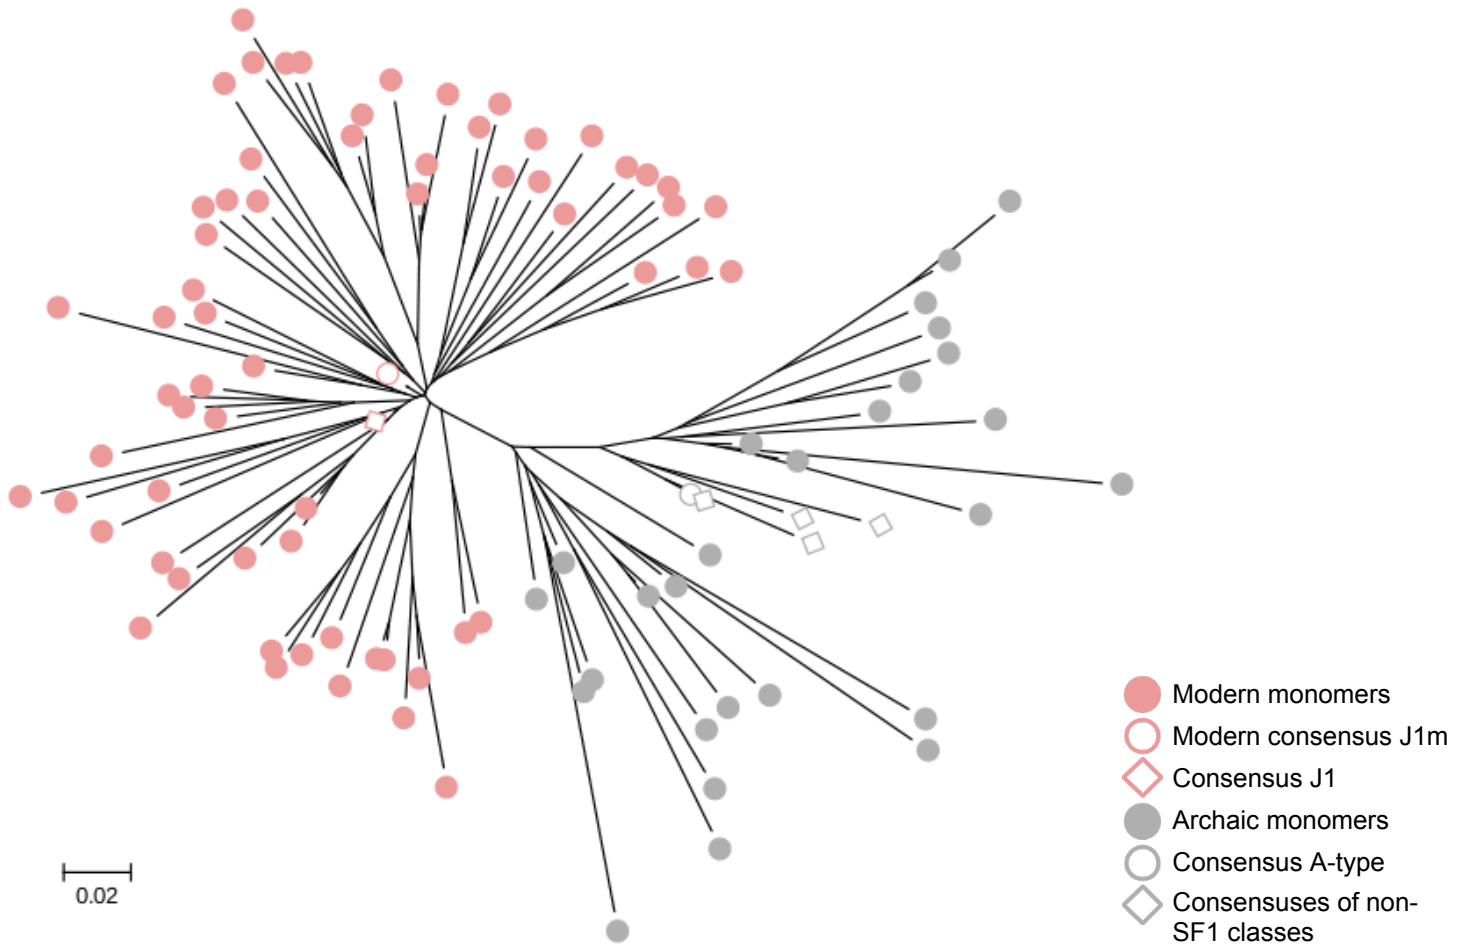

SF1 B-type monomers

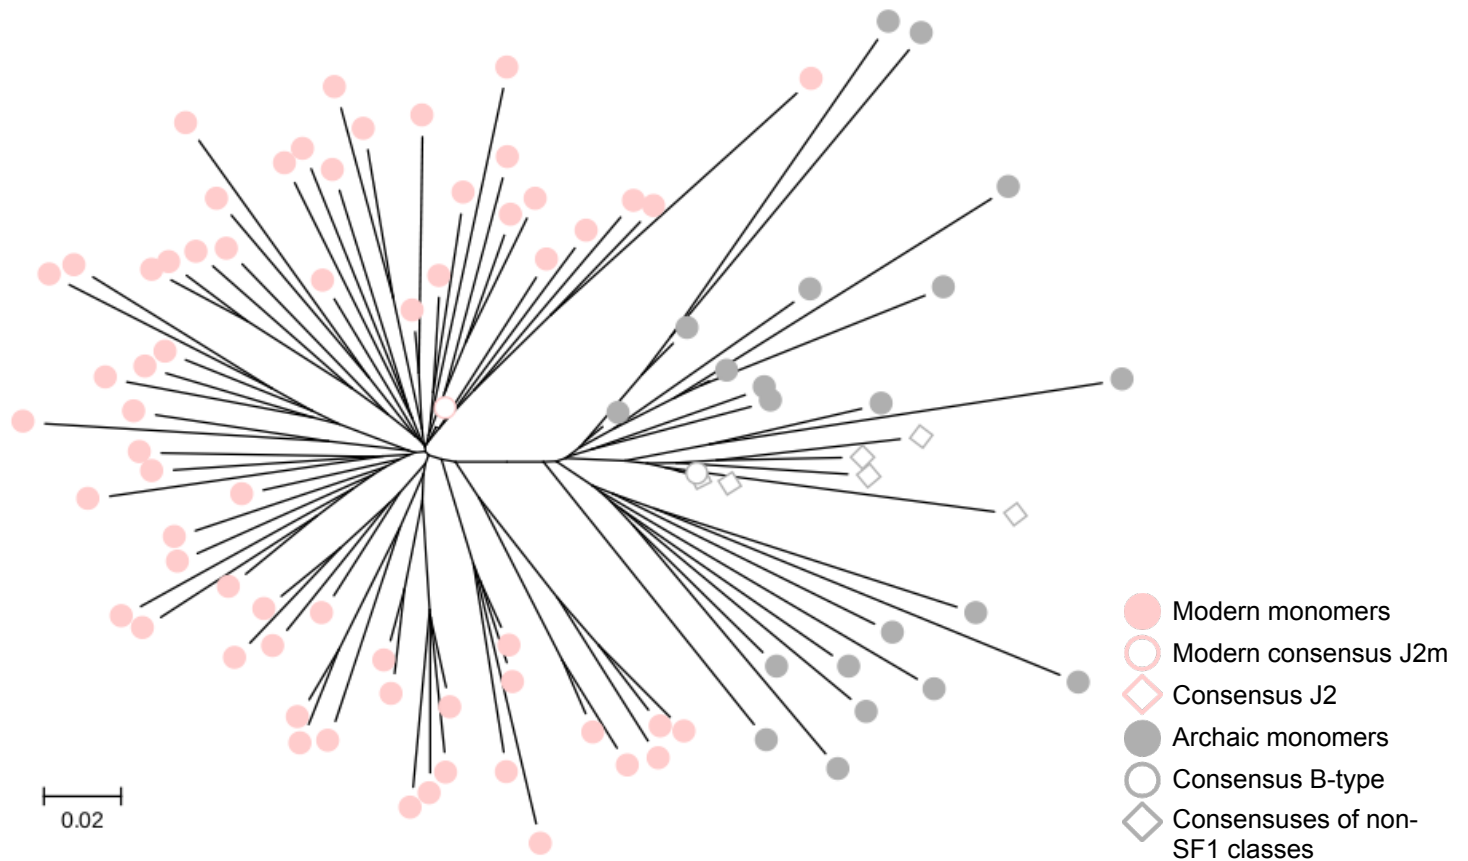

Supplement: mmc5.pdf [file mmc5.pdf]
