# Supplementary material for: Classification and monomer-by-monomer annotation dataset of suprachromosomal family 1 alpha satellite higher-order repeats in hg38 human genome assembly
Source: PubMed Central journal article supplement — Data Brief. 2019 Mar 8;24:103708. doi: 10.1016/j.dib.2019.103708 (PMC6447721; doi:10.1016/j.dib.2019.103708), 2019-03-08
Supplement: mmc1.pdf [file mmc1.pdf]

**Disclosure statements**

The authors declare that there is no conflict of interests with respect to the work published in this paper.
