# Supplementary material for: Classification and monomer-by-monomer annotation dataset of suprachromosomal family 1 alpha satellite higher-order repeats in hg38 human genome assembly
Source: PubMed Central journal article supplement — Data Brief. 2019 Mar 8;24:103708. doi: 10.1016/j.dib.2019.103708 (PMC6447721; doi:10.1016/j.dib.2019.103708), 2019-03-08
Supplement: mmc3.pdf [file mmc3.pdf]

**Table S1. Haplotype analysis of SF1 monomers**

**Monomers with box A**

| Sequence name           | Haplotype positions |    |    |    |    |    |    |    |    |     |           |     |     |     |     |     | Simtc <sup>1</sup> | Simcc <sup>2</sup> |
|-------------------------|---------------------|----|----|----|----|----|----|----|----|-----|-----------|-----|-----|-----|-----|-----|--------------------|--------------------|
|                         | 4                   | 15 | 20 | 21 | 36 | 42 | 60 | 61 | 79 | 94  | 110       | 127 | 140 | 153 | 164 | 171 |                    |                    |
| cons A-type             | C                   | C  | G  | G  | T  | G  | A  | C  | G  | T   | A         | G   | G   | T   | T   | G   |                    |                    |
| cons J1m master modern  | T                   | G  | C  | A  | A  | A  | G  | T  | T  | A   | G         | T   | C   | G   | G   | A   |                    |                    |
| cons_D2_AJ130752        | C                   | C  | G  | G  | T  | G  | C  | C  | G  | T   | A         | G   | G   | T   | T   | G   | 15                 | 0                  |
| cons_R2v2               | C                   | T  | G  | G  | T  | G  | A  | C  | G  | T   | A         | G   | G   | T   | T   | G   | 15                 | 0                  |
| cons_W4_AJ130761        | C                   | C  | G  | G  | T  | G  | A  | C  | G  | A   | A         | G   | G   | G   | T   | G   | 14                 | 2                  |
| cons_W5_AJ130762        | C                   | G  | G  | G  | T  | A  | A  | T  | G  | T   | G         | G   | G   | C   | T   | G   | 11                 | 4                  |
| <b>Archaic monomers</b> |                     |    |    |    |    |    |    |    |    |     |           |     |     |     |     |     |                    |                    |
| S1C3H1L.9               | T                   | T  | T  | G  | T  | T  | A  | T  | T  | A   | A         | G   | T   | T   | C   | G   | 7                  | 4                  |
| S1C3H1L.10              | T                   | T  | A  | G  | T  | A  | C  | C  | G  | G   | A         | C   | A   | T   | T   | G   | 8                  | 2                  |
| S1C3H3d.1_cons          | T                   | T  | A  | G  | T  | A  | A  | C  | G  | A   | A         | G   | G   | T   | T   | G   | 11                 | 3                  |
| S1C3H3d.3_cons          | T                   | T  | A  | G  | T  | A  | A  | T  | T  | A   | G         | T   | G   | T   | T   | G   | 7                  | 7                  |
| S1C3H3d.5_cons          | T                   | T  | A  | G  | T  | A  | A  | T  | T  | A   | A         | T   | G   | T   | T   | G   | 8                  | 6                  |
| S1C3H2.1                | T                   | T  | A  | G  | T  | A  | A  | C  | G  | A   | C         | G   | G   | T   | T   | G   | 10                 | 3                  |
| S1C3H2.3                | T                   | T  | A  | G  | T  | G  | A  | T  | T  | A   | C         | T   | G   | T   | T   | G   | 8                  | 5                  |
| S1C3H2.5                | T                   | T  | A  | C  | T  | A  | A  | C  | T  | G   | A         | T   | G   | G   | T   | G   | 7                  | 5                  |
| S1C3H2.6                | T                   | T  | A  | G  | T  | A  | A  | C  | G  | T   | A         | G   | G   | T   | T   | G   | 12                 | 2                  |
| S1C3H2.8                | T                   | T  | A  | G  | T  | A  | G  | T  | T  | A   | G         | T   | G   | T   | T   | G   | 6                  | 8                  |
| S1C3H2.10               | T                   | T  | A  | G  | T  | A  | A  | C  | T  | A   | A         | T   | C   | T   | T   | G   | 8                  | 6                  |
| S1C6H1L.1               | T                   | T  | A  | G  | T  | A  | A  | T  | T  | G   | G         | T   | G   | T   | T   | G   | 7                  | 6                  |
| S1C6H1L.3               | T                   | T  | A  | T  | T  | A  | C  | T  | T  | G   | G         | A   | G   | T   | T   | G   | 5                  | 5                  |
| S1C6H1L.4               | T                   | T  | A  | G  | C  | A  | A  | C  | G  | A   | A         | G   | T   | T   | T   | G   | 9                  | 3                  |
| S1C6H1L.6               | T                   | T  | A  | G  | T  | A  | A  | T  | T  | A   | G         | T   | G   | T   | C   | A   | 5                  | 8                  |
| S1C6H1L.8               | T                   | T  | A  | G  | T  | A  | C  | C  | G  | C   | A         | G   | G   | G   | T   | G   | 9                  | 3                  |
| S1C6H1L.10              | T                   | C  | A  | G  | T  | A  | C  | C  | G  | A   | A         | C   | G   | G   | T   | G   | 9                  | 4                  |
| S1C6H1L.12              | T                   | T  | G  | G  | T  | A  | C  | C  | C  | A   | A         | G   | G   | T   | T   | G   | 10                 | 3                  |
| S1C6H1L.14              | T                   | T  | A  | G  | T  | A  | C  | C  | G  | A   | A         | G   | G   | T   | T   | G   | 10                 | 3                  |
| S1C6H1L.17              | T                   | T  | A  | G  | T  | A  | C  | C  | G  | A   | A         | G   | G   | T   | T   | G   | 10                 | 3                  |
| S1C12H3d.1_cons         | T                   | T  | A  | G  | T  | A  | A  | C  | G  | A   | A         | C   | G   | G   | T   | G   | 9                  | 4                  |
| S1C12H3d.3_cons         | T                   | T  | G  | A  | T  | A  | A  | C  | T  | A   | G         | T   | G   | T   | G/T | A   | 6                  | 8                  |
| S1C12H3d.5_cons         | T                   | T  | G  | G  | G  | A  | A  | T  | T  | A   | C/G<br>/A | T   | G   | T   | G   | A   | 5                  | 8                  |
| S1C12H3d.6_cons         | T                   | T  | A  | A  | T  | A  | A  | T  | G  | A   | G         | G   | G   | T   | G   | A   | 6                  | 8                  |
| S1C12H3d.8_cons         | T                   | T  | A  | G  | T  | A  | A  | T  | T  | A   | A/G       | T   | G   | T   | T   | G   | 7                  | 6                  |
| S1CMH1d.1_cons          | T                   | T  | A  | G  | T  | A  | A  | C  | G  | A   | A         | G   | G   | T   | T   | G   | 11                 | 3                  |
| S1CMH1d.3_cons          | T                   | T  | A  | G  | T  | A  | A  | T  | T  | A   | G         | T   | G   | T   | G   | A   | 5                  | 9                  |
| <b>Modern monomers</b>  |                     |    |    |    |    |    |    |    |    |     |           |     |     |     |     |     |                    |                    |
| cons_J1_AJ130753        | T                   | G  | C  | A  | A  | A  | G  | T  | T  | A/G | G         | T   | C   | G   | G   | A   | 0                  | 15                 |
| S1C1/5/19H1L.1          | T                   | G  | C  | A  | A  | A  | G  | T  | T  | G   | G         | T   | C   | G   | G   | A   | 0                  | 15                 |
| S1C1/5/19H1L.3          | T                   | G  | C  | A  | A  | A  | G  | T  | T  | G   | G         | T   | C   | G   | G   | C   | 0                  | 14                 |
| S1C1/5/19H1L.5          | T                   | G  | C  | A  | A  | A  | G  | T  | T  | T   | G         | T   | C   | G   | G   | A   | 1                  | 15                 |
| S1C3H1L.1               | T                   | G  | C  | A  | A  | A  | G  | T  | T  | G   | A         | T   | C   | G   | G   | A   | 1                  | 14                 |
| S1C3H1L.3               | T                   | G  | C  | A  | A  | G  | G  | T  | T  | A   | A         | T   | C   | G   | G   | A   | 2                  | 14                 |

**Table S1. Haplotype analysis of SF1 monomers**

**Monomers with box A**

| Sequence name          | Haplotype positions |    |    |    |    |    |    |    |    |    |     |     |     |     |     |     | Simtc <sup>1</sup> | Simcc <sup>2</sup> |
|------------------------|---------------------|----|----|----|----|----|----|----|----|----|-----|-----|-----|-----|-----|-----|--------------------|--------------------|
|                        | 4                   | 15 | 20 | 21 | 36 | 42 | 60 | 61 | 79 | 94 | 110 | 127 | 140 | 153 | 164 | 171 |                    |                    |
| cons A-type            | C                   | C  | G  | G  | T  | G  | A  | C  | G  | T  | A   | G   | G   | T   | T   | G   |                    |                    |
| cons J1m master modern | T                   | G  | C  | A  | A  | A  | G  | T  | T  | A  | G   | T   | C   | G   | G   | A   |                    |                    |
| S1C3H1L.5              | T                   | A  | C  | T  | A  | A  | G  | T  | T  | G  | A   | G   | C   | G   | G   | C   | 2                  | 10                 |
| S1C3H1L.7              | T                   | G  | C  | T  | A  | A  | G  | T  | T  | A  | G   | T   | C   | G   | G   | A   | 0                  | 15                 |
| S1C3H1L.12             | T                   | G  | C  | A  | A  | A  | G  | T  | T  | G  | G   | T   | C   | C   | T   | G   | 2                  | 12                 |
| S1C3H1L.14             | T                   | G  | C  | A  | A  | A  | G  | T  | T  | A  | G   | T   | C   | G   | G   | A   | 0                  | 16                 |
| S1C3H1L.16             | T                   | G  | C  | A  | A  | A  | G  | T  | T  | A  | G   | T   | C   | G   | T   | G   | 2                  | 14                 |
| S1C5pH2.2              | T                   | A  | C  | A  | A  | A  | G  | T  | T  | G  | G   | T   | C   | G   | G   | A   | 0                  | 14                 |
| S1C5pH2.4              | T                   | G  | C  | A  | A  | A  | G  | T  | T  | G  | G   | C   | C   | G   | G   | A   | 0                  | 14                 |
| S1C5pH2.6              | T                   | G  | C  | A  | A  | A  | A  | C  | T  | G  | G   | T   | C   | G   | G   | A   | 2                  | 13                 |
| S1C5pH2.8              | T                   | G  | C  | A  | A  | A  | G  | A  | T  | G  | G   | T   | C   | G   | G   | A   | 0                  | 14                 |
| S1C5pH2.10             | T                   | G  | C  | A  | A  | A  | G  | C  | T  | G  | A   | T   | C   | G   | G   | A   | 2                  | 13                 |
| S1C5pH2.12             | T                   | G  | C  | A  | A  | A  | G  | T  | T  | A  | G   | T   | C   | G   | G   | A   | 0                  | 16                 |
| S1C5pH2.14             | T                   | G  | C  | A  | A  | A  | G  | T  | T  | G  | G   | T   | C   | G   | G   | A   | 0                  | 15                 |
| S1C5pH2.16             | T                   | G  | C  | A  | A  | A  | T  | T  | T  | G  | G   | T   | C   | G   | G   | C   | 0                  | 13                 |
| S1C7H1L.1              | T                   | G  | C  | A  | A  | A  | G  | T  | T  | G  | G   | T   | C   | G   | G   | A   | 0                  | 15                 |
| S1C7H1L.3              | T                   | G  | C  | T  | A  | A  | A  | A  | T  | T  | G   | T   | C   | G   | G   | A   | 2                  | 12                 |
| S1C7H1L.5              | T                   | G  | C  | A  | A  | A  | A  | A  | T  | A  | C   | T   | C   | A   | G   | A   | 1                  | 12                 |
| S1C10/12H1d.1_cons     | T                   | G  | C  | A  | A  | A  | G  | T  | T  | A  | G   | T   | C   | G   | G   | A   | 0                  | 16                 |
| S1C10H1-B.1            | T                   | G  | C  | G  | T  | A  | G  | T  | T  | A  | C   | T   | C   | G   | G   | A   | 2                  | 13                 |
| S1C10H1-B.3            | T                   | G  | C  | A  | A  | A  | A  | T  | T  | A  | G   | T   | A   | G   | T   | A   | 2                  | 13                 |
| S1C10H1-B.5            | T                   | G  | C  | A  | T  | A  | G  | T  | T  | A  | G   | T   | C   | G   | G   | A   | 1                  | 15                 |
| S1C10H1-B.7            | T                   | G  | C  | A  | A  | T  | G  | T  | T  | A  | G   | T   | C   | G   | G   | A   | 0                  | 15                 |
| S1C10H1-B.3.2          | T                   | G  | C  | A  | A  | A  | G  | T  | T  | A  | G   | T   | A   | G   | C   | A   | 0                  | 14                 |
| S1C10H1-B.5.2          | T                   | G  | C  | A  | T  | A  | G  | T  | T  | A  | G   | T   | C   | G   | G   | A   | 1                  | 15                 |
| S1C10H1-B.7.2          | T                   | G  | C  | A  | A  | T  | G  | T  | T  | G  | G   | T   | T   | G   | G   | A   | 0                  | 13                 |
| S1C10H1-C.1            | T                   | G  | C  | A  | A  | A  | G  | T  | T  | A  | C   | T   | A   | G   | A   | A   | 0                  | 13                 |
| S1C10H1-C.3            | T                   | G  | C  | A  | A  | A  | G  | T  | T  | A  | G   | T   | A   | G   | C   | A   | 0                  | 14                 |
| S1C10H1-C.5            | T                   | G  | C  | A  | T  | A  | G  | T  | T  | A  | G   | T   | A   | G   | G   | A   | 1                  | 14                 |
| S1C10H1-C.7            | T                   | G  | C  | A  | A  | T  | G  | T  | T  | A  | G   | T   | C   | G   | G   | A   | 0                  | 15                 |
| S1C10H1L.1             | T                   | G  | C  | A  | A  | A  | A  | T  | T  | A  | C   | T   | C   | G   | A   | A   | 1                  | 13                 |
| S1C10H1L.3             | T                   | G  | C  | A  | A  | A  | G  | T  | T  | A  | G   | T   | A   | G   | C   | A   | 0                  | 14                 |
| S1C10H1L.5             | T                   | G  | C  | A  | T  | A  | G  | T  | T  | A  | G   | T   | C   | G   | G   | A   | 1                  | 15                 |
| S1C10H1L.7             | T                   | G  | C  | A  | A  | T  | G  | T  | T  | G  | G   | C   | C   | G   | G   | A   | 0                  | 13                 |
| S1C10H2.1              | T                   | G  | C  | A  | A  | A  | G  | T  | T  | A  | G   | T   | A   | G   | C   | A   | 0                  | 14                 |
| S1C10H2.3              | T                   | G  | C  | T  | A  | A  | G  | T  | T  | A  | G   | T   | C   | G   | A   | A   | 0                  | 14                 |
| S1C10H2.5              | T                   | G  | C  | A  | A  | A  | G  | T  | T  | A  | G   | T   | A   | G   | T   | A   | 1                  | 14                 |
| S1C10H2.7              | T                   | G  | C  | A  | A  | A  | G  | T  | T  | A  | G   | T   | C   | G   | G   | A   | 0                  | 16                 |
| S1C10H2.9              | T                   | G  | C  | A  | A  | A  | G  | A  | T  | A  | G   | T   | C   | G   | C   | A   | 0                  | 14                 |
| S1C10H2.11             | T                   | G  | C  | A  | A  | A  | G  | T  | T  | T  | G   | T   | C   | G   | C   | A   | 1                  | 14                 |
| S1C10H2.13             | T                   | G  | C  | A  | A  | A  | G  | T  | C  | G  | G   | T   | C   | G   | T   | A   | 1                  | 13                 |
| S1C10H2.15             | T                   | G  | C  | A  | A  | A  | G  | T  | T  | A  | G   | T   | C   | G   | G   | A   | 0                  | 16                 |

**Table S1. Haplotype analysis of SF1 monomers**

**Monomers with box A**

| Sequence name          | Haplotype positions |    |    |    |    |    |    |    |    |    |     |     |     |     |     |     | Simtc <sup>1</sup> | Simcc <sup>2</sup> |
|------------------------|---------------------|----|----|----|----|----|----|----|----|----|-----|-----|-----|-----|-----|-----|--------------------|--------------------|
|                        | 4                   | 15 | 20 | 21 | 36 | 42 | 60 | 61 | 79 | 94 | 110 | 127 | 140 | 153 | 164 | 171 |                    |                    |
| cons A-type            | C                   | C  | G  | G  | T  | G  | A  | C  | G  | T  | A   | G   | G   | T   | T   | G   |                    |                    |
| cons J1m master modern | T                   | G  | C  | A  | A  | A  | G  | T  | T  | A  | G   | T   | C   | G   | G   | A   |                    |                    |
| S1C10H2.17             | T                   | G  | C  | A  | A  | A  | G  | A  | T  | A  | G   | T   | C   | G   | C   | A   | 0                  | 14                 |
| S1C12H1L.1             | T                   | G  | C  | A  | A  | A  | G  | T  | T  | A  | G   | T   | G   | G   | G   | A   | 1                  | 15                 |
| S1C12H1L.3             | T                   | G  | C  | A  | T  | A  | T  | T  | T  | T  | G   | T   | G   | G   | G   | A   | 3                  | 12                 |
| S1C12H1L.5             | T                   | G  | C  | A  | A  | A  | G  | T  | T  | A  | G   | T   | C   | G   | G   | A   | 0                  | 16                 |
| S1C12H1L.7             | T                   | G  | C  | A  | A  | A  | G  | T  | T  | A  | G   | T   | G   | G   | C   | A   | 1                  | 14                 |
| S1C12H2.1              | T                   | G  | C  | A  | A  | A  | G  | T  | T  | A  | G   | T   | C   | G   | -   | A   | 0                  | 15                 |
| S1C12H2.3              | T                   | A  | C  | A  | A  | A  | A  | T  | T  | A  | G   | T   | C   | G   | G   | A   | 1                  | 14                 |
| S1C12H2.5              | T                   | G  | G  | T  | A  | A  | G  | T  | T  | A  | G   | T   | C   | G   | G   | A   | 1                  | 14                 |
| S1C12H2.7              | T                   | G  | C  | A  | A  | A  | G  | T  | T  | A  | G   | T   | C   | A   | C   | A   | 0                  | 14                 |
| S1C12H2.9              | T                   | G  | C  | G  | A  | A  | G  | T  | T  | A  | G   | T   | G   | G   | C   | A   | 2                  | 13                 |
| S1C12H2.11             | T                   | A  | C  | A  | A  | A  | G  | T  | T  | A  | G   | T   | C   | G   | G   | T   | 0                  | 14                 |
| S1C12H2.13             | T                   | G  | C  | A  | A  | A  | G  | T  | T  | A  | G   | T   | C   | A   | C   | A   | 0                  | 14                 |
| S1C12H2.15             | T                   | G  | T  | A  | A  | A  | G  | T  | T  | A  | G   | T   | G   | G   | C   | A   | 1                  | 13                 |
| S1C12H2.17             | T                   | G  | C  | A  | A  | A  | G  | T  | T  | A  | G   | T   | C   | G   | C   | A   | 0                  | 15                 |
| S1C16H1L.1             | T                   | G  | C  | A  | A  | A  | G  | T  | T  | G  | G   | T   | C   | G   | G   | A   | 0                  | 15                 |
| S1C16H1L.3             | T                   | G  | C  | A  | A  | A  | G  | T  | T  | G  | G   | T   | C   | G   | G   | A   | 0                  | 15                 |
| S1C16H1L.5             | T                   | G  | C  | A  | A  | A  | G  | T  | T  | C  | G   | T   | C   | G   | G   | A   | 0                  | 15                 |
| S1C16H1L.7             | T                   | G  | C  | A  | A  | A  | G  | T  | T  | G  | G   | T   | C   | G   | G   | A   | 0                  | 15                 |
| S1C16H1L.9             | T                   | G  | C  | A  | A  | A  | C  | T  | T  | G  | G   | T   | C   | G   | G   | A   | 0                  | 14                 |

**Table S1. Haplotype analysis of SF1 monomers**

**Monomers with box B**

| Sequence name          | Haplotype positions |    |    |    |    |    |    |    |    |     |     |     |     |     |     | Simtc <sup>1</sup> | Simcc <sup>2</sup> |
|------------------------|---------------------|----|----|----|----|----|----|----|----|-----|-----|-----|-----|-----|-----|--------------------|--------------------|
|                        | 2                   | 52 | 54 | 61 | 66 | 67 | 68 | 80 | 89 | 102 | 109 | 139 | 142 | 150 | 170 |                    |                    |
| cons B-type            | A                   | A  | A  | C  | A  | A  | A  | C  | A  | A   | C   | T   | T   | G/T | A   |                    |                    |
| cons J2m master modern | G                   | -  | T  | T  | T  | G  | -  | A  | T  | T   | T   | A   | C   | A   | G   |                    |                    |
| cons_D1_AJ130751       | A                   | A  | A  | T  | A  | A  | T  | C  | A  | A   | C   | T   | T   | G   | A   | 13                 | 1                  |
| cons_R1_AJ130756       | A                   | A  | A  | C  | A  | A  | A  | C  | A  | A   | C   | T   | T   | T   | A   | 15                 | 0                  |
| cons_W1_AJ130758       | A                   | T  | A  | C  | -  | -  | -  | C  | A  | A   | C   | -   | T   | G   | A   | 10                 | 1                  |
| cons_W2_AJ130759       | A                   | A  | A  | C  | A  | A  | C  | C  | A  | A   | C   | T   | T   | T   | G   | 13                 | 1                  |
| cons_W3_AJ130760       | A                   | T  | A  | C  | A  | A  | A  | C  | A  | A   | T   | T   | C/T | C   | A   | 11                 | 1                  |

| Archaic monomers |   |   |   |   |   |   |   |   |   |   |   |   |   |     |   |    |   |
|------------------|---|---|---|---|---|---|---|---|---|---|---|---|---|-----|---|----|---|
| S1C3H1L.8        | G | - | T | T | A | C | - | A | A | A | C | G | A | T   | A | 6  | 6 |
| S1C3H3d.2_cons   | A | - | T | T | A | A | - | A | A | A | C | C | T | T   | A | 9  | 5 |
| S1C3H3d.4_cons   | A | - | T | T | A | A | - | A | A | A | C | C | T | T   | A | 9  | 5 |
| S1C3H2.2         | A | - | T | T | A | A | - | A | A | A | C | C | T | T   | A | 9  | 5 |
| S1C3H2.4         | A | - | T | T | A | A | - | A | A | A | C | C | T | C   | A | 8  | 5 |
| S1C3H2.7         | G | - | T | T | A | A | - | A | A | A | C | C | T | T   | A | 8  | 6 |
| S1C3H2.9         | A | - | T | T | A | C | - | A | A | A | C | T | T | G   | A | 9  | 5 |
| S1C6H1L.2        | A | - | T | T | C | T | - | A | A | A | C | T | C | T   | A | 7  | 6 |
| S1C6H1L.5        | A | - | T | T | C | C | - | A | A | A | C | T | T | T   | A | 8  | 5 |
| S1C6H1L.7        | G | A | G | C | A | A | G | T | A | A | T | T | G | T   | A | 9  | 2 |
| S1C6H1L.9        | A | - | T | T | A | C | - | A | A | A | C | T | T | T   | A | 9  | 5 |
| S1C6H1L.11       | A | - | T | T | A | C | - | A | A | A | A | T | T | T   | A | 8  | 5 |
| S1C6H1L.13       | A | - | T | T | A | T | - | A | A | T | C | G | T | -   | A | 6  | 6 |
| S1C6H1L.15       | A | - | T | T | C | T | - | A | A | A | C | T | T | T   | A | 8  | 5 |
| S1C6H1L.16       | A | - | T | T | A | T | - | A | A | A | C | G | T | T   | A | 8  | 5 |
| S1C6H1L.18       | A | - | T | T | A | C | - | A | T | A | C | T | T | T   | A | 8  | 6 |
| S1C12H3d.2_cons  | A | - | T | T | A | A | - | A | A | A | T | C | T | T   | A | 8  | 6 |
| S1C12H3d.4_cons  | G | - | T | T | A | A | - | A | A | A | C | T | T | T   | T | 8  | 6 |
| S1C12H3d.7_cons  | G | - | T | T | A | A | - | A | A | A | T | C | T | T   | A | 7  | 7 |
| S1CMH1d.2_cons   | A | - | T | T | A | A | - | A | A | A | C | T | T | A/T | A | 9  | 5 |
| S1CMH1d.4_cons   | G | A | A | C | A | A | A | T | A | A | T | T | T | T   | A | 12 | 2 |

| Modern monomers |   |   |   |   |   |   |   |   |   |   |   |   |     |   |   |   |    |
|-----------------|---|---|---|---|---|---|---|---|---|---|---|---|-----|---|---|---|----|
| cons J2         | G | - | T | T | T | G | - | A | T | T | T | A | C/T | A | G | 0 | 14 |
| S1C1/5/19H1L.2  | G | - | T | T | G | C | - | A | T | T | C | A | C   | A | G | 1 | 12 |
| S1C1/5/19H1L.4  | T | - | T | T | T | G | - | A | T | T | T | A | C   | A | G | 0 | 14 |
| S1C1/5/19H1L.6  | C | - | T | T | T | G | - | A | T | T | T | A | G   | A | G | 0 | 13 |
| S1C3H1L.2       | G | - | T | T | T | G | - | A | G | G | T | A | C   | A | G | 0 | 13 |
| S1C3H1L.4       | T | - | T | C | T | G | - | A | T | A | T | A | C   | A | G | 2 | 12 |
| S1C3H1L.6       | G | - | T | T | T | T | T | A | T | - | T | A | C   | A | G | 0 | 12 |
| S1C3H1L.11      | A | - | T | T | T | G | - | A | G | G | T | A | C   | A | G | 1 | 12 |
| S1C3H1L.13      | A | - | T | T | T | G | - | A | T | T | T | A | A   | A | G | 1 | 13 |
| S1C3H1L.15      | G | - | T | T | T | G | - | A | T | T | T | A | C   | A | G | 0 | 15 |
| S1C3H1L.17      | A | - | T | T | T | G | - | A | T | T | T | A | C   | A | G | 1 | 14 |
| S1C5pH2.1       | G | - | T | T | T | G | - | A | T | T | T | A | C   | A | G | 0 | 15 |

**Table S1. Haplotype analysis of SF1 monomers**

**Monomers with box B**

| Sequence name          | Haplotype positions |    |    |    |    |    |    |    |    |     |     |     |     |     |     | Simtc <sup>1</sup> | Simcc <sup>2</sup> |
|------------------------|---------------------|----|----|----|----|----|----|----|----|-----|-----|-----|-----|-----|-----|--------------------|--------------------|
|                        | 2                   | 52 | 54 | 61 | 66 | 67 | 68 | 80 | 89 | 102 | 109 | 139 | 142 | 150 | 170 |                    |                    |
| cons B-type            | A                   | A  | A  | C  | A  | A  | A  | C  | A  | A   | C   | T   | T   | G/T | A   |                    |                    |
| cons J2m master modern | G                   | -  | T  | T  | T  | G  | -  | A  | T  | T   | T   | A   | C   | A   | G   |                    |                    |
| S1C5pH2.3              | G                   | -  | T  | T  | G  | G  | -  | A  | T  | T   | T   | A   | T   | A   | G   | 1                  | 13                 |
| S1C5pH2.5              | G                   | -  | T  | T  | T  | G  | -  | A  | T  | T   | T   | A   | T   | A   | G   | 1                  | 14                 |
| S1C5pH2.7              | G                   | -  | T  | T  | G  | G  | -  | A  | T  | T   | T   | A   | T   | A   | G   | 1                  | 13                 |
| S1C5pH2.9              | G                   | -  | T  | T  | T  | G  | -  | A  | T  | T   | T   | A   | G   | A   | G   | 0                  | 14                 |
| S1C5pH2.11             | A                   | -  | T  | T  | T  | G  | -  | A  | T  | T   | T   | A   | T   | A   | G   | 2                  | 13                 |
| S1C5pH2.13             | G                   | -  | T  | T  | T  | G  | -  | A  | T  | T   | T   | A   | C   | A   | G   | 0                  | 15                 |
| S1C5pH2.15             | G                   | -  | T  | T  | G  | G  | -  | A  | T  | T   | T   | A   | C   | A   | G   | 0                  | 14                 |
| S1C7H1L.2              | G                   | -  | T  | T  | T  | G  | -  | A  | T  | T   | C   | A   | C   | A   | G   | 1                  | 14                 |
| S1C7H1L.4              | G                   | -  | T  | T  | T  | G  | -  | A  | T  | C   | T   | A   | C   | A   | G   | 0                  | 14                 |
| S1C7H1L.6              | G                   | -  | T  | T  | T  | G  | -  | A  | T  | T   | T   | A   | G   | A   | G   | 0                  | 14                 |
| S1C10/12H1d.2_cons     | G                   | -  | T  | T  | T  | G  | -  | A  | T  | T   | T   | A   | C   | A   | G   | 0                  | 15                 |
| S1C10H1-B.2            | G                   | -  | T  | T  | C  | G  | -  | A  | T  | T   | C   | A   | G   | A   | G   | 1                  | 12                 |
| S1C10H1-B.4            | G                   | -  | T  | T  | T  | G  | -  | A  | T  | T   | T   | G   | G   | A   | G   | 0                  | 13                 |
| S1C10H1-B.6            | G                   | -  | T  | T  | T  | G  | -  | A  | T  | T   | T   | A   | C   | T   | G   | 1                  | 14                 |
| S1C10H1-B.8            | G                   | -  | T  | T  | T  | G  | -  | A  | T  | T   | A   | A   | C   | C   | G   | 0                  | 13                 |
| S1C10H1-B.2.2          | G                   | -  | T  | T  | C  | G  | -  | A  | T  | T   | C   | A   | G   | A   | G   | 1                  | 12                 |
| S1C10H1-B.4.2          | G                   | -  | T  | T  | T  | T  | -  | A  | T  | T   | T   | A   | G   | A   | G   | 0                  | 13                 |
| S1C10H1-B.6.2          | G                   | -  | T  | T  | T  | G  | -  | A  | T  | T   | T   | A   | C   | T   | G   | 1                  | 14                 |
| S1C10H1-C.2            | G                   | -  | T  | T  | C  | G  | -  | A  | T  | T   | T   | A   | G   | A   | G   | 0                  | 13                 |
| S1C10H1-C.4            | G                   | -  | T  | C  | T  | G  | -  | A  | T  | T   | T   | A   | G   | A   | G   | 1                  | 13                 |
| S1C10H1-C.6            | G                   | -  | T  | T  | C  | G  | -  | A  | T  | T   | T   | A   | C   | T   | G   | 1                  | 13                 |
| S1C10H1-C.8            | G                   | -  | T  | T  | T  | G  | -  | A  | T  | C   | T   | A   | C   | T   | G   | 1                  | 13                 |
| S1C10H1L.2             | G                   | -  | T  | T  | C  | G  | -  | A  | T  | T   | T   | A   | G   | A   | G   | 0                  | 13                 |
| S1C10H1L.4             | G                   | -  | T  | T  | T  | G  | -  | A  | T  | T   | T   | A   | G   | A   | G   | 0                  | 14                 |
| S1C10H1L.6             | G                   | -  | T  | T  | T  | G  | -  | A  | T  | T   | T   | A   | C   | T   | G   | 1                  | 14                 |
| S1C10H1L.8             | G                   | -  | T  | T  | T  | G  | -  | A  | T  | T   | T   | A   | C   | T   | G   | 1                  | 14                 |
| S1C10H2.2              | G                   | -  | T  | T  | T  | G  | -  | A  | T  | T   | T   | A   | A   | T   | G   | 1                  | 13                 |
| S1C10H2.4              | G                   | -  | T  | T  | T  | G  | -  | T  | T  | T   | T   | A   | G   | A   | G   | 0                  | 13                 |
| S1C10H2.6              | G                   | -  | T  | T  | T  | G  | -  | C  | T  | T   | T   | A   | C   | A   | G   | 1                  | 14                 |
| S1C10H2.8              | G                   | -  | T  | T  | T  | C  | -  | A  | T  | T   | C   | A   | C   | T   | G   | 2                  | 12                 |
| S1C10H2.10             | G                   | -  | T  | T  | T  | G  | -  | A  | T  | C   | T   | A   | C   | A   | G   | 0                  | 14                 |
| S1C10H2.12             | G                   | -  | T  | T  | T  | G  | -  | A  | T  | T   | T   | A   | C   | A   | T   | 0                  | 14                 |
| S1C10H2.14             | G                   | -  | T  | T  | T  | G  | -  | C  | T  | T   | T   | A   | C   | A   | G   | 1                  | 14                 |
| S1C10H2.16             | G                   | -  | T  | T  | T  | G  | -  | A  | T  | T   | C   | A   | C   | T   | G   | 2                  | 13                 |
| S1C10H2.18             | G                   | -  | T  | T  | T  | G  | -  | A  | T  | T   | C   | A   | G   | A   | G   | 1                  | 13                 |
| S1C12H1L.2             | G                   | -  | T  | T  | T  | G  | -  | A  | T  | C   | T   | A   | -   | A   | G   | 0                  | 13                 |
| S1C12H1L.4             | G                   | -  | T  | A  | T  | G  | -  | A  | T  | G   | T   | A   | C   | A   | G   | 0                  | 13                 |
| S1C12H1L.6             | G                   | -  | T  | T  | C  | G  | -  | A  | T  | T   | T   | A   | C   | A   | G   | 0                  | 14                 |
| S1C12H1L.8             | G                   | -  | T  | T  | T  | G  | -  | A  | T  | G   | T   | A   | A   | A   | G   | 0                  | 13                 |
| S1C12H2.2              | G                   | -  | T  | T  | T  | G  | -  | A  | T  | T   | T   | A   | G   | A   | G   | 0                  | 14                 |

**Table S1. Haplotype analysis of SF1 monomers****Monomers with box B**

| Sequence name          | Haplotype positions |    |    |    |    |    |    |    |    |     |     |     |     |     |     | Simtc <sup>1</sup> | Simcc <sup>2</sup> |
|------------------------|---------------------|----|----|----|----|----|----|----|----|-----|-----|-----|-----|-----|-----|--------------------|--------------------|
|                        | 2                   | 52 | 54 | 61 | 66 | 67 | 68 | 80 | 89 | 102 | 109 | 139 | 142 | 150 | 170 |                    |                    |
| cons B-type            | A                   | A  | A  | C  | A  | A  | A  | C  | A  | A   | C   | T   | T   | G/T | A   |                    |                    |
| cons J2m master modern | G                   | -  | T  | T  | T  | G  | -  | A  | T  | T   | T   | A   | C   | A   | G   |                    |                    |
| S1C12H2.4              | G                   | -  | T  | T  | T  | G  | -  | A  | T  | T   | T   | A   | C   | A   | G   | 0                  | 15                 |
| S1C12H2.6              | G                   | -  | T  | T  | T  | G  | -  | A  | T  | T   | T   | A   | G   | A   | G   | 0                  | 14                 |
| S1C12H2.8              | A                   | -  | T  | T  | T  | G  | -  | A  | T  | T   | T   | A   | A   | A   | G   | 1                  | 13                 |
| S1C12H2.10             | T                   | -  | T  | T  | T  | G  | -  | A  | T  | T   | C   | A   | C   | A   | G   | 1                  | 13                 |
| S1C12H2.12             | G                   | -  | T  | T  | T  | G  | -  | A  | T  | T   | T   | A   | G   | A   | G   | 0                  | 14                 |
| S1C12H2.14             | A                   | -  | T  | T  | T  | G  | -  | A  | T  | T   | T   | A   | T   | A   | G   | 2                  | 13                 |
| S1C12H2.16             | G                   | -  | T  | T  | T  | G  | -  | A  | A  | T   | T   | T   | C   | A   | G   | 2                  | 13                 |
| S1C12H2.18             | G                   | -  | T  | T  | T  | G  | -  | A  | T  | G   | T   | A   | C   | A   | T   | 0                  | 13                 |
| S1C16H1L.2             | G                   | -  | T  | T  | G  | G  | -  | A  | T  | T   | C   | A   | C   | A   | G   | 1                  | 13                 |
| S1C16H1L.4             | G                   | -  | T  | T  | T  | G  | -  | A  | T  | T   | T   | A   | C   | A   | G   | 0                  | 15                 |
| S1C16H1L.6             | G                   | -  | T  | T  | T  | G  | -  | A  | T  | T   | T   | A   | C   | A   | G   | 0                  | 15                 |
| S1C16H1L.8             | G                   | -  | T  | T  | T  | G  | -  | A  | T  | T   | T   | A   | C   | A   | G   | 0                  | 15                 |
| S1C16H1L.10            | G                   | -  | T  | T  | G  | G  | -  | A  | T  | T   | T   | A   | C   | A   | G   | 0                  | 14                 |

<sup>1</sup> A number of positions coinciding with type consensus. <sup>2</sup> A number of positions coinciding with class consensus.

**Note to table S1.**

Haplotype analysis was performed as described in [1] (see Supplementary note 1 there) and briefly summarized in section 2.2 of the main text in this paper. Slight changes in consensus monomers used are described in section 2.10 of the main text in this paper and are shown in Table S3. Table S1 is divided in two sections (J1 and J2 haplotypes) with archaic monomers shown in the upper part of each section and modern monomers at the bottom. Type-specific A or B monomers and class-specific consensus monomers from which the type-specific monomers were derived are shown at the top of each section. J1m or J2m shared positions are marked pink, ancestral positions are marked grey, and non-informative positions are white. One can see that monomers of archaic HORs have only partial SF1 haplotypes and the monomers of modern HORs have complete or almost complete haplotypes.

**Table S2. Divergence values for each monomer of 8 selected HORs**

| <b>HOR name</b> | <b>Number of monomers</b> | <b>Min (%)</b> | <b>Max (%)</b> | <b>Mean (%)</b> | <b>Median (%)</b> |
|-----------------|---------------------------|----------------|----------------|-----------------|-------------------|
| S1C3H3d.1       | 150                       | 0              | 22.75          | 13.38           | 13.45             |
| S1C3H3d.2       | 148                       | 0              | 22.49          | 13.49           | 13.61             |
| S1C3H3d.3       | 156                       | 0              | 24.26          | 14.21           | 14.12             |
| S1C3H3d.4       | 160                       | 2.37           | 25.6           | 14.68           | 14.79             |
| S1C3H3d.5       | 144                       | 1.18           | 25.15          | 14.91           | 14.79             |
| S1C6H1L.1       | 302                       | 0              | 5.26           | 1.04            | 1.17              |
| S1C6H1L.2       | 303                       | 0              | 6.06           | 1.05            | 0.6               |
| S1C6H1L.3       | 304                       | 0              | 14.37          | 1.71            | 1.76              |
| S1C6H1L.4       | 302                       | 0              | 8.77           | 0.89            | 0.58              |
| S1C6H1L.5       | 301                       | 0              | 11.98          | 0.72            | 0.59              |
| S1C6H1L.6       | 302                       | 0              | 5.26           | 0.64            | 0.58              |
| S1C6H1L.7       | 303                       | 0              | 7.83           | 0.74            | 0.58              |
| S1C6H1L.8       | 303                       | 0              | 9.04           | 0.51            | 0.58              |
| S1C6H1L.9       | 303                       | 0              | 16.36          | 0.43            | 0                 |
| S1C6H1L.10      | 303                       | 0              | 11.7           | 1.24            | 1.17              |
| S1C6H1L.11      | 303                       | 0              | 6.55           | 1.52            | 1.78              |
| S1C6H1L.12      | 303                       | 0              | 5.92           | 0.93            | 0.58              |
| S1C6H1L.13      | 302                       | 0              | 6.63           | 1.07            | 0.61              |
| S1C6H1L.14      | 301                       | 0              | 4.71           | 0.75            | 0.59              |
| S1C6H1L.15      | 302                       | 0              | 6.51           | 1.2             | 1.18              |
| S1C6H1L.16      | 301                       | 0              | 10.65          | 0.62            | 0                 |
| S1C6H1L.17      | 301                       | 0              | 5.26           | 0.34            | 0                 |
| S1C6H1L.18      | 303                       | 0              | 16.07          | 1.18            | 1.19              |
| S1C7H1L.1       | 297                       | 0              | 5.52           | 1.34            | 1.1               |
| S1C7H1L.2       | 316                       | 0              | 10.17          | 1.64            | 1.67              |
| S1C7H1L.3       | 319                       | 0              | 13.41          | 1.25            | 0.55              |
| S1C7H1L.4       | 301                       | 0              | 11.73          | 1.92            | 1.67              |
| S1C7H1L.5       | 292                       | 0              | 10.86          | 1.41            | 1.1               |
| S1C7H1L.6       | 293                       | 0              | 12.14          | 0.99            | 0.55              |
| S1C10H1L.1      | 695                       | 0              | 11.98          | 3.03            | 2.92              |
| S1C10H1L.2      | 465                       | 0              | 11.52          | 2.93            | 2.96              |
| S1C10H1L.3      | 234                       | 0              | 7.06           | 1.46            | 1.18              |
| S1C10H1L.4      | 179                       | 0              | 15.06          | 4.53            | 4.19              |
| S1C10H1L.5      | 428                       | 0              | 15.66          | 2.27            | 1.75              |
| S1C10H1L.6      | 517                       | 0              | 11.24          | 3.21            | 2.99              |
| S1C10H1L.7      | 702                       | 0              | 11.11          | 2.73            | 2.92              |
| S1C10H1L.8      | 698                       | 0              | 13.17          | 2.77            | 2.41              |
| S1C10/12H1d.1   | 27                        | 2.34           | 21.76          | 14.14           | 14.2              |
| S1C10/12H1d.2   | 29                        | 2.98           | 22.02          | 13.22           | 13.02             |
| S1C12H1L.1      | 307                       | 0              | 11.67          | 2.43            | 1.66              |
| S1C12H1L.2      | 296                       | 0              | 16.29          | 2.48            | 1.69              |
| S1C12H1L.3      | 296                       | 0              | 11.17          | 2.26            | 1.73              |

**Table S2. Divergence values for each monomer of 8 selected HORs**

| HOR name   | Number of monomers | Min (%) | Max (%) | Mean (%) | Median (%) |
|------------|--------------------|---------|---------|----------|------------|
| S1C12H1L.4 | 296                | 0       | 10.67   | 2.74     | 2.25       |
| S1C12H1L.5 | 299                | 0       | 13.33   | 2.77     | 1.67       |
| S1C12H1L.6 | 313                | 0       | 11.73   | 2.42     | 2.22       |
| S1C12H1L.7 | 311                | 0       | 9.44    | 1.45     | 1.1        |
| S1C12H1L.8 | 311                | 0       | 11.17   | 1.94     | 1.67       |
| S1C12H3d.1 | 5                  | 2.94    | 12.43   | 7.89     | 6.82       |
| S1C12H3d.2 | 6                  | 5.33    | 13.02   | 8.64     | 8.28       |
| S1C12H3d.3 | 6                  | 4.19    | 12.28   | 8.97     | 8.98       |
| S1C12H3d.4 | 15                 | 5.39    | 17.86   | 11.42    | 11.31      |
| S1C12H3d.5 | 15                 | 4.19    | 14.04   | 10.26    | 9.94       |
| S1C12H3d.6 | 5                  | 2.92    | 12.35   | 9.32     | 9.94       |
| S1C12H3d.7 | 4                  | 5.33    | 11.98   | 8.15     | 7.44       |
| S1C12H3d.8 | 5                  | 4.73    | 14.62   | 8.98     | 9.06       |
| S1CMH1d.1  | 44                 | 3.51    | 21.69   | 13.09    | 12.94      |
| S1CMH1d.2  | 26                 | 8.28    | 21.43   | 14.09    | 14.2       |
| S1CMH1d.3  | 24                 | 6.47    | 25.15   | 14.63    | 14.62      |
| S1CMH1d.4  | 24                 | 4.09    | 21.64   | 13.47    | 13.61      |

**Note to Table S2.**

This Table presents the data used for the boxplot in Fig. 1, but separately for each monomer in a HOR. For divergent HORs, we used aligned monomers from the master regions utilized for MSA profiles (see Alignment file 1 and Legend to Fig. 1). We chose to use these relatively short but hand-picked and well studied regions to avoid possible problems with false recognition, rearranged monomers, etc., which would arise if we collected monomers genome-wide through the Table Browser. Such problems could exaggerate the divergence. The number of monomers in the master regions varied greatly because for some HORs longer continuous and relatively pure arrays were not available in the assembly. As very large arrays of homogeneous HORs were available in the RMs, we sought to obtain statistically robust estimates which would not be affected by possible more homogenous domains within arrays. As the divergence for polymorphic S1C10H1L appeared to be somewhat higher than for non-polymorphic homogenous HORs, we tested for possible effects of domain structure within the RM. We first determined the divergence in one more sample region, then mixed both samples and determined the divergence again. The results were similar. In conclusion, one can see that there is a large gap in divergence between homogenous and divergent HORs and S1C10H1L is somewhat more divergent than non-polymorphic homogenous HORs.



**Table S3. Modifications to consensus monomers shown in Alignment files made for haplotype analysis**

| Sequence name (Alignment file 2 and 3)                                                                                                                                                | Position | Base unmodified | Base modified |
|---------------------------------------------------------------------------------------------------------------------------------------------------------------------------------------|----------|-----------------|---------------|
| cons_A_type_AJ131207 modified 12-G 44-A_deleted                                                                                                                                       | 15       | N               | C             |
|                                                                                                                                                                                       | 153      | N               | T             |
| cons_J1_AJ130753                                                                                                                                                                      | 94       | N               | A/G           |
|                                                                                                                                                                                       | 152      | N               | T/A           |
| S1C10/12H1d.1_cons_th_0.50                                                                                                                                                            | 26       | N               | C/A           |
| S1C12H3d.3_cons_th_0.50                                                                                                                                                               | 68       | N               | A/C           |
|                                                                                                                                                                                       | 131      | N               | A/C           |
|                                                                                                                                                                                       | 163      | N               | C/T           |
|                                                                                                                                                                                       | 164      | N               | G/T           |
| S1C12H3d.5_cons_th_0.50                                                                                                                                                               | 110      | N               | C/G/A         |
| S1C12H3d.6_cons_th_0.50                                                                                                                                                               | 95       | N               | C/G           |
| S1C12H3d.8_cons_th_0.50                                                                                                                                                               | 29       | N               | C/G           |
|                                                                                                                                                                                       | 110      | N               | A/G           |
| cons_B_type_AJ131208                                                                                                                                                                  | 25       | N               | T             |
|                                                                                                                                                                                       | 68       | N               | A             |
|                                                                                                                                                                                       | 106      | N               | G             |
|                                                                                                                                                                                       | 131      | N               | C             |
|                                                                                                                                                                                       | 150      | N               | G/T           |
| cons_J2_AJ130754 modified 19C-T 20A-G 63N-T 64N-A 65T-A 66G-T 67A-G 79A-G 80C-A 88T-G 89A-T 101T-G 102A-T 108T-G 109C-T 130N-C 138A-T 139TA 141C-A 142T-C 149A-G 150T-A 169G-T 170A-G | 142      | C               | C/T           |
| cons_D1_AJ130751                                                                                                                                                                      | 106      | N               | T             |
| cons_W3_AJ130760                                                                                                                                                                      | 142      | N               | C/T           |
| cons_R1_AJ130756                                                                                                                                                                      | 25       | N               | G             |
| S1C12H3d.2_cons_th_0.50                                                                                                                                                               | 158      | N               | A/C           |
| S1C12H3d.7_cons_th_0.50                                                                                                                                                               | 39       | N               | G/A/T         |
|                                                                                                                                                                                       | 47       | N               | C/T           |
|                                                                                                                                                                                       | 140      | N               | A/G           |
| S1CMH1d.2_cons_th_0.50                                                                                                                                                                | 150      | N               | A/T           |
| S1CMH1d.4_cons_th_0.50                                                                                                                                                                | 35       | N               | C/T           |

**Note to Table S3.**

Modifications made to consensus sequences for haplotype analysis are described in detail in section 2.10 of the main text. Unmodified consensus monomers are shown in Alignment files 2 and 3. Type and class consensus monomers there are the same that have been published in [1]. Modifications listed in the names of type A and J2 consensus monomers refer to the differences between consensus monomers published in [1] and the sequences deposited in GenBank previously (accession numbers are included in the name).

**Table S4. HOR assignments of SF1/SF5 mixed AS regions in hg38 assembly (modified Table 4 from [1])**

| SF  | Location | Position in hg38                        | Contig                                                                                                                           | Size (bp) <sup>1</sup> | HORs on dot-matrix                       | HORs identified in this paper                                                                        |
|-----|----------|-----------------------------------------|----------------------------------------------------------------------------------------------------------------------------------|------------------------|------------------------------------------|------------------------------------------------------------------------------------------------------|
| 1/5 | 3p11.1   | <a href="#">chr3:90482385-90722299</a>  | ABBA01004652.1,<br>AEKP01209350.1,<br>ABBA01004653.1,<br>AEKP01209353.1,<br>ABBA01004654.1,<br>ABBA01004655.1,<br>ABBA01004656.1 | 229,441                | No HOR                                   | Mainly S1C3H3d plus large piece of pure S1CMH1d.                                                     |
| 1/5 | 3p11.1   | <a href="#">chr3:90772554-91233510</a>  | GJ211866.1                                                                                                                       | 460,956                | HOR 1.7 kb                               | Pure S1C3H2.                                                                                         |
| 1/5 | 3q11.1   | <a href="#">chr3:91233782-91247547</a>  | GJ211867.1                                                                                                                       | 13,765                 | No HOR other than AB dimer identity ~93% | S1C3H2-related made of hybrids.<br>Misprocessed RM?                                                  |
| 1/5 | 3q11.1   | <a href="#">chr3:91247775-91286183</a>  | ABBA01000927.1,<br>ABBA01000928.1,<br>ABBA01000929.1,<br>ABBA01000930.1,<br>ABBA01000931.1                                       | 17,430                 | HOR 1.7 kb                               | Pure S1C3H2.                                                                                         |
| 1/5 | 3q11.1   | <a href="#">chr3:93716246-93725946</a>  | ABBA01026974.1                                                                                                                   | 9700                   | No HOR                                   | Pure S1CMH1d.                                                                                        |
| 1/5 | 6q11.1   | <a href="#">chr6:60230028-60241613</a>  | AC244258.2                                                                                                                       | 11,401                 | No HOR                                   | Small piece of S1C3H3 and larger S1CMH1d interspersed with pieces of S1C3H3.                         |
| 1/5 | 6q11.1   | <a href="#">chr6:61371445-61427364</a>  | AEKP01189806.1,<br>AEKP01189805.1,<br>AEKP01189804.1,<br>AEKP01189803.1,<br>AEKP01189802.1,<br>FP325349.3                        | 55,519                 | No HOR                                   | Poorly covered <sup>2</sup> S1CMH1d interspersed with single S1C3H3 monomers.                        |
| 1/5 | 8p11.1   | <a href="#">chr8:43940231-43965733</a>  | AC127507.4,<br>AC144576.3                                                                                                        | 22,886                 | No HOR                                   | Poorly covered <sup>2</sup> S1CMH1d.                                                                 |
| 1/5 | 8q11.1   | <a href="#">chr8:45946092-45971262</a>  | AC118650.5                                                                                                                       | 22,549                 | No HOR                                   | Poorly covered <sup>2</sup> S1CMH1d. SD of the above.                                                |
| 1/5 | 10p11.1  | <a href="#">chr10:39548571-39555979</a> | ABBA01020707.1                                                                                                                   | 7408                   | No HOR                                   | Pure S1CMH1d.                                                                                        |
| 1/5 | 10q      | <a href="#">chr10:41830204-41842397</a> | BX322613.6                                                                                                                       | 12,194                 | No HOR                                   | S1CMH1d interspersed with S1C12H3.8 and S1C10/12H1 with a small piece of pure S1C10/12H1 at the end. |
| 1/5 | 12p11.1  | <a href="#">chr12:34686342-34715037</a> | AC144535.4,<br>AUXG01000432.1                                                                                                    | 28,658                 | No HOR                                   | Large pure S1CMH1d and smaller pure S1C12H3d.                                                        |
| 1/5 | 12q      | <a href="#">chr12:37268020-37276031</a> | ABBA01049496.1,<br>AEKP01211346.1                                                                                                | 8012                   | No HOR                                   | Pure S1C12H3d.                                                                                       |

<sup>1</sup> Size has been corrected to exclude L1-repeats and gaps.

<sup>2</sup> Monomers which are not covered with SF1 HOR monomers mainly identify with SF5 class monomers and are invisible in the HOR-track.
